# Supplementary material for: Preclinical Safety Studies of Enadenotucirev, a Chimeric Group B Human-Specific Oncolytic Adenovirus
Source: PubMed Central journal article supplement — Mol Ther Oncolytics. 2017 Mar 29;5:62–74. doi: 10.1016/j.omto.2017.03.003 (PMC5415321; doi:10.1016/j.omto.2017.03.003), 2017-03-29
Supplement: mmc1.pdf [file mmc1.pdf]

**OMTO, Volume 5**

**Supplemental Information**

**Preclinical Safety Studies of Enadenotucirev,  
a Chimeric Group B Human-Specific Oncolytic**

**Adenovirus**

**Sam Illingworth, Ying Di, Maxine Bauzon, Janet Lei, Margaret R. Duffy, Simon Alvis, Brian Champion, André Lieber, Terry Hermiston, Len W. Seymour, John Beadle, and Kerry Fisher**

**Supplementary Data S1. Haematology and cytokine tables supplementary to Figure 3c following intravenous injection of  $1 \times 10^{11}$  particles enadenotucirev (EnAd) n=5; or replication incompetent enadenotucirev (EnAdCJ132) or saline.**

**a** Hematology parameters of CD46 transgenic mice following the administration of a single dose of EnAd, EnAdCJ132, and Virus buffer (n = 5/group). Values represent mean  $\pm$  standard deviation.

| Parameter                             | Time Point              | Treatment                   |                 |                           |
|---------------------------------------|-------------------------|-----------------------------|-----------------|---------------------------|
|                                       |                         | Buffer                      | EnAd            | EnAd1CJ132                |
| WBC, $10^3/\mu\text{L}$               | Pre-dosing <sup>a</sup> | 9.50 $\pm$ 2.06             | 9.50 $\pm$ 2.06 | 9.50 $\pm$ 2.06           |
|                                       | 24 hrs post             | 8.04 $\pm$ 2.18             | 0.83 $\pm$ 0.22 | 0.93 $\pm$ 0.31           |
|                                       | 72 hrs post             | 9.37 $\pm$ 0.81             | 3.17 $\pm$ 0.54 | 3.41 $\pm$ 1.56           |
| RBC, $10^6/\mu\text{L}$               | Pre-dosing <sup>a</sup> | 9.01 $\pm$ 0.41             | 9.01 $\pm$ 0.41 | 9.01 $\pm$ 0.41           |
|                                       | 24 hrs post             | 7.82 $\pm$ 0.63             | 7.62 $\pm$ 0.70 | 8.92 $\pm$ 0.46           |
|                                       | 72 hrs post             | 7.79 $\pm$ 0.42             | 6.59 $\pm$ 1.11 | 7.27 $\pm$ 0.65           |
| Platelets, $10^3/\mu\text{L}$         | Pre-dosing <sup>b</sup> | 1,071 $\pm$ 132             | 1,071 $\pm$ 132 | 1,071 $\pm$ 132           |
|                                       | 24 hrs post             | 1,040 $\pm$ 122             | 702 $\pm$ 230   | 747 $\pm$ 165             |
|                                       | 72 hrs post             | 1,058 $\pm$ 108             | 442 $\pm$ 203   | 544 $\pm$ 121             |
| Hemoglobin, g/dL                      | Pre-dosing <sup>a</sup> | 15.0 $\pm$ 0.7              | 15.0 $\pm$ 0.7  | 15.0 $\pm$ 0.7            |
|                                       | 24 hrs post             | 13.1 $\pm$ 1.4              | 12.3 $\pm$ 1.4  | 14.4 $\pm$ 0.5            |
|                                       | 72 hrs post             | 12.6 $\pm$ 0.8              | 11.0 $\pm$ 1.8  | 12.5 $\pm$ 1.2            |
| Hematocrit, %                         | Pre-dosing              | 46.7 $\pm$ 1.1 <sup>d</sup> | 45.0 $\pm$ 3.1  | 44.8 $\pm$ 1.2            |
|                                       | 24 hrs post             | 35.5 $\pm$ 6.3              | 36.3 $\pm$ 3.8  | 43.8 $\pm$ 2.7            |
|                                       | 72 hrs post             | 37.1 $\pm$ 2.9              | 33.2 $\pm$ 1.2  | 35.3 $\pm$ 3.9            |
| Alanine aminotransferase (sGPT), IU/L | Pre-dosing <sup>c</sup> | 76 $\pm$ 29                 | 76 $\pm$ 29     | 76 $\pm$ 29               |
|                                       | 72 hrs post             | 52 $\pm$ 44 <sup>d</sup>    | 107 $\pm$ 30    | 269 $\pm$ 24 <sup>d</sup> |

a) Pooling of mice from all groups, n = 15 (Buffer, n = 5; ColoAd1, n = 5; ColoAd1CJ132, n = 5).

b) Pooling of mice from all groups, n = 14 (Buffer, n = 4; ColoAd1, n = 5; ColoAd1CJ132, n = 5).

c) Pooling of mice from all groups, n = 6.

d) N = 4.

**b**

| Chemokine | Time Point              | Treatment              |                        |                        |
|-----------|-------------------------|------------------------|------------------------|------------------------|
|           |                         | Buffer                 | EnAd1                  | EnAdCJ132              |
| IL-12p70  | Pre-dosing <sup>a</sup> | 115.1 $\pm$ 25.9       | 115.1 $\pm$ 25.9       | 115.1 $\pm$ 25.9       |
|           | 1 hr post               | 105.3 $\pm$ 27.0       | 101.9 $\pm$ 21.2       | 117.7 $\pm$ 17.9       |
|           | 6 hrs post              | 90.1 $\pm$ 28.5        | 104.0 $\pm$ 24.3       | 106.4 $\pm$ 31.8       |
|           | 24 hrs post             | 93.6 $\pm$ 15.5        | 73.0 $\pm$ 27.0        | 109.9 $\pm$ 13.8       |
|           |                         |                        |                        |                        |
| TNF-a     | Pre-dosing <sup>a</sup> | 31.7 $\pm$ 23.0        | 31.7 $\pm$ 23.0        | 31.7 $\pm$ 23.0        |
|           | 1 hr post               | 45.6 $\pm$ 15.6        | 91.7 $\pm$ 28.1        | 76.8 $\pm$ 21.1        |
|           | 6 hrs post              | 31.4 $\pm$ 7.9         | 438.7 $\pm$ 202.0      | 261.7 $\pm$ 68.3       |
|           | 24 hrs post             | 20.8 $\pm$ 24.2        | 68.5 $\pm$ 15.2        | 82.6 $\pm$ 21.2        |
|           |                         |                        |                        |                        |
| IFN-a     | Pre-dosing <sup>a</sup> | 13.5 $\pm$ 2.2         | 13.5 $\pm$ 2.2         | 13.5 $\pm$ 2.2         |
|           | 1 hr post               | 14.0 $\pm$ 2.7         | 14.7 $\pm$ 2.1         | 16.1 $\pm$ 2.1         |
|           | 6 hrs post              | 12.4 $\pm$ 2.5         | 108.2 $\pm$ 160.0      | 35.7 $\pm$ 9.3         |
|           | 24 hrs post             | 12.5 $\pm$ 2.8         | 48.2 $\pm$ 12.8        | 55.8 $\pm$ 22.0        |
|           |                         |                        |                        |                        |
| MCP-1     | Pre-dosing <sup>a</sup> | 10 $\pm$ 28            | 10 $\pm$ 28            | 10 $\pm$ 28            |
|           | 1 hr post               | 58 $\pm$ 68            | 1,824 $\pm$ 269        | 640 $\pm$ 318          |
|           | 6 hrs post              | 96 $\pm$ 68            | 32,663 $\pm$ 31,374    | 19,293 $\pm$ 11,443    |
|           | 24 hrs post             | 453 $\pm$ 214          | 6,438 $\pm$ 1,457      | 6,856 $\pm$ 306        |
|           |                         |                        |                        |                        |
| IL-10     | Pre-dosing <sup>a</sup> | 0 $\pm$ 0 <sup>b</sup> | 0 $\pm$ 0 <sup>b</sup> | 0 $\pm$ 0 <sup>b</sup> |
|           | 1 hr post               | 0 $\pm$ 0 <sup>b</sup> | 0 $\pm$ 0 <sup>b</sup> | 0 $\pm$ 0 <sup>b</sup> |
|           | 6 hrs post              | 0 $\pm$ 0 <sup>b</sup> | 0 $\pm$ 0 <sup>b</sup> | 0 $\pm$ 0 <sup>b</sup> |
|           | 24 hrs post             | 0 $\pm$ 0 <sup>b</sup> | 0 $\pm$ 0 <sup>b</sup> | 0 $\pm$ 0 <sup>b</sup> |
|           |                         |                        |                        |                        |
| IL-6      | Pre-dosing <sup>a</sup> | 17 $\pm$ 11            | 17 $\pm$ 11            | 17 $\pm$ 11            |
|           | 1 hr post               | 8 $\pm$ 6              | 159 $\pm$ 39           | 109 $\pm$ 62           |
|           | 6 hrs post              | 19 $\pm$ 7             | 2,652 $\pm$ 1,334      | 1,196 $\pm$ 597        |
|           | 24 hrs post             | 46 $\pm$ 36            | 63 $\pm$ 32            | 70 $\pm$ 41            |
|           |                         |                        |                        |                        |

<sup>a</sup>Pooling of mice from all groups; <sup>b</sup>levels below limit of detection.
